# Supplementary material for: Internet-Based Cognitive Behavioral Therapy for Chronic Fatigue Syndrome Integrated in Routine Clinical Care: Implementation Study
Source: PubMed Central journal article supplement (PMC6914231; doi:10.2196/14037), 2019-10-10
Supplement: jmir_v21i10e14037_app1.pdf [file jmir_v21i10e14037_app1.pdf]

## Worm-Smeitink, Margreet

---

**Van:** Cruysen, Yvonne van der namens Postbus Commissie Mensgebonden Onderzoek  
**Verzonden:** donderdag 6 juni 2019 11:38  
**Aan:** 'Margreet Worm'  
**CC:** Worm-Smeitink, Margreet  
**Onderwerp:** 2014-1236 Niet WMO verklaring Engels

**Title: Grip op vermoeidheid**  
**Filenummer CMO : 2014-1236**

Dear mrs. Worm - Smeitink,

On behalf of the research ethics committee of the Radboud University Nijmegen Medical Centre I hereby let you know that the abovementioned study doesn't fall within the remit of the Medical Research Involving Human Subjects Act (WMO).

The study has been reviewed by the ethics committee on the basis of the Dutch Code of conduct for health research, the Dutch Code of conduct for responsible use, the Dutch Personal Data Protection Act and the Medical Treatment Agreement Act.

The ethics committee has passed a positive judgment on the study.

The documents mentioned in appendix 1 have been reviewed.

Best regards,  
Prof. dr. P.N.R. Dekhuijzen, Chairman

Research Ethics Committee  
Radboud University Nijmegen Medical Centre

Concernstaf Kwaliteit en Veiligheid  
Commissie Mensgebonden Onderzoek  
T (024) 361 31 54

**Radboud universitair medisch centrum**  
Postbus 9101, 6500 HB Nijmegen (huispost 628)  
Geert Grooteplein (route 628)  
[www.radboudumc.nl](http://www.radboudumc.nl)  
[www.cmoregio-a-n.nl](http://www.cmoregio-a-n.nl)

Appendix 1:

- Aanbiedingsbrief versie 1 d.d. 6 augustus 2014
- Protocol Grip op vermoeidheid versie 1
- Informatie voor diënt versie 1 d.d. 16 september 2014
- Vragenlijst EuroQol-6d
- Vragenlijst PCQ
- Vragenlijst MCQ
- Reactie op commissievragen d.d. 16 september 2014
